# Supplementary material
Source: PubMed Central journal article supplement (PMC3439584)
Supplement: NIHMS382501-supplement-Figure_S1.pdf [file NIHMS382501-supplement-Figure_S1.pdf]

A

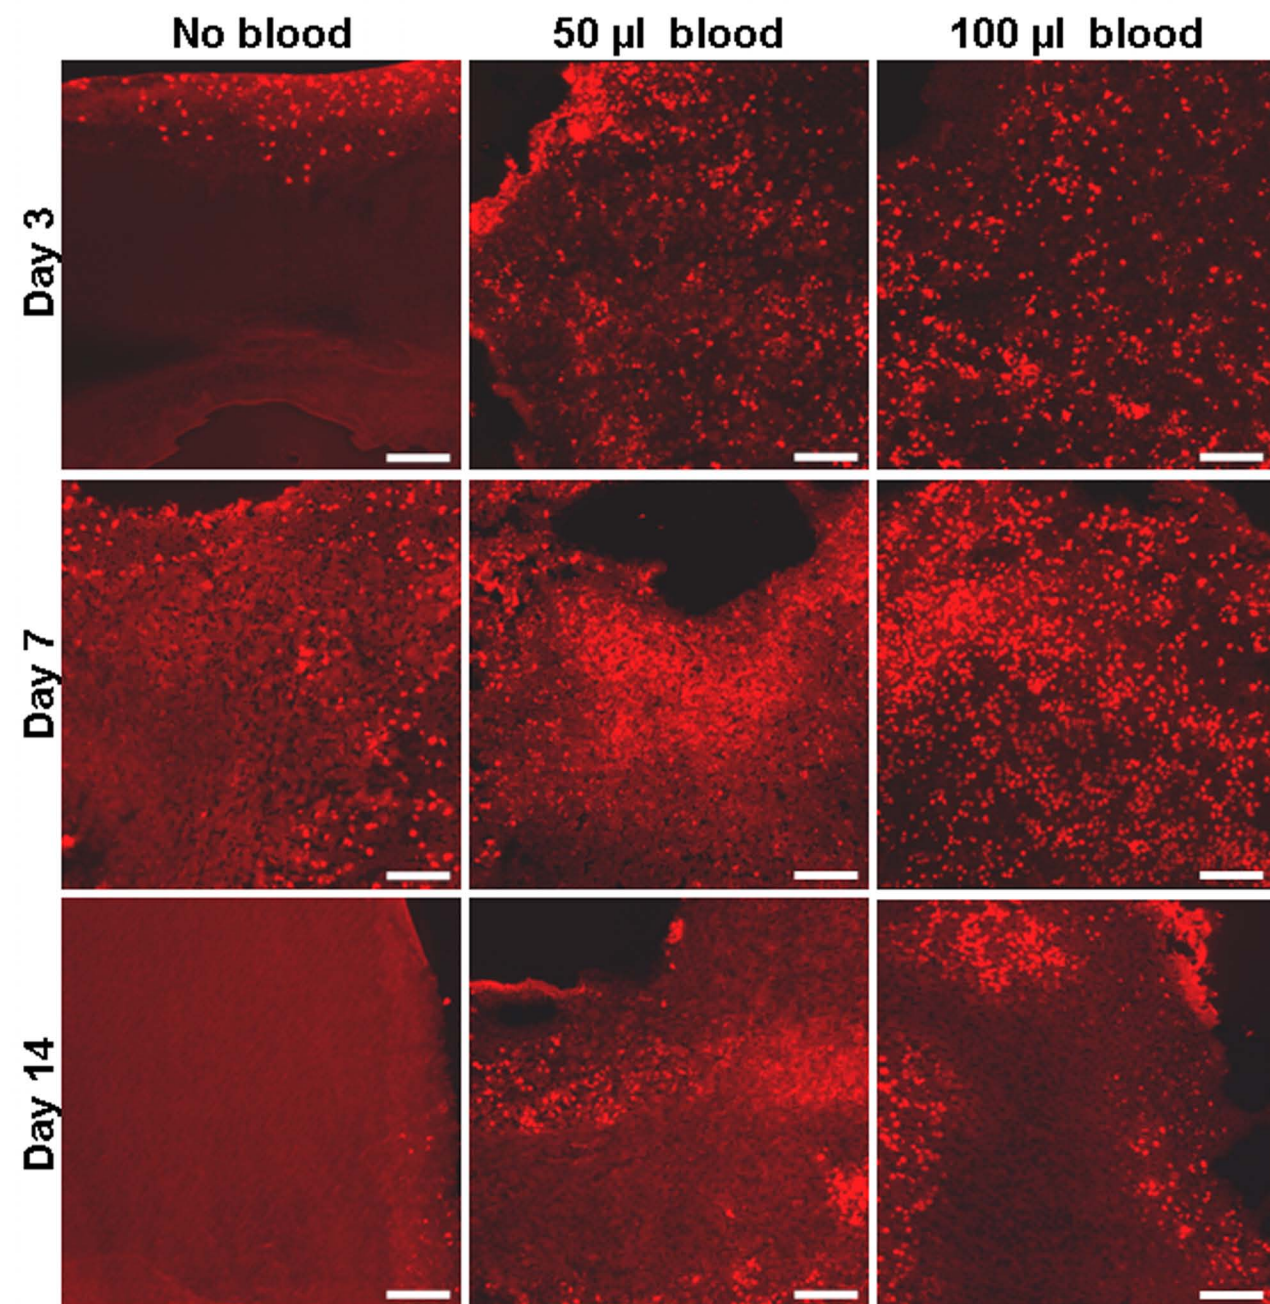Propidium iodide (+) cells (/mm<sup>2</sup>)

B

● CTRL  
 ■ 50 µl blood  
 ▲ 100 µl blood

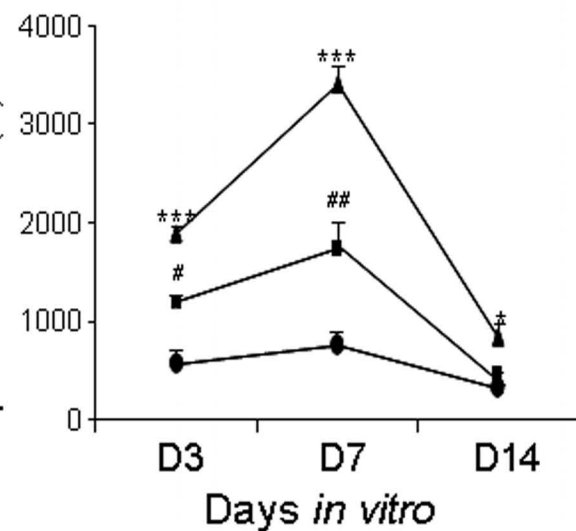

C

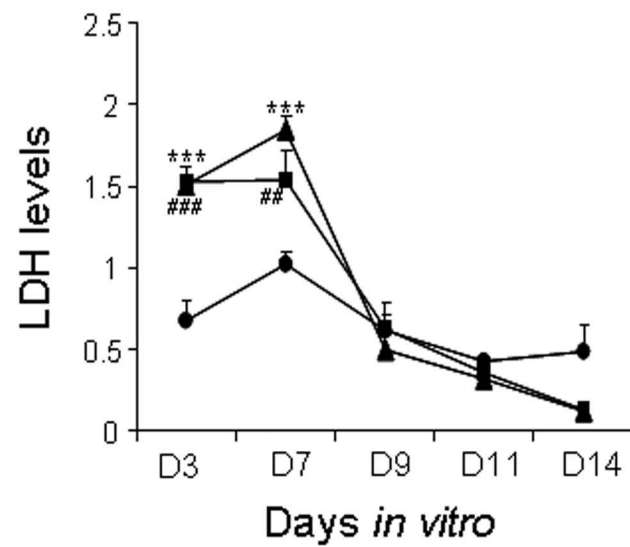

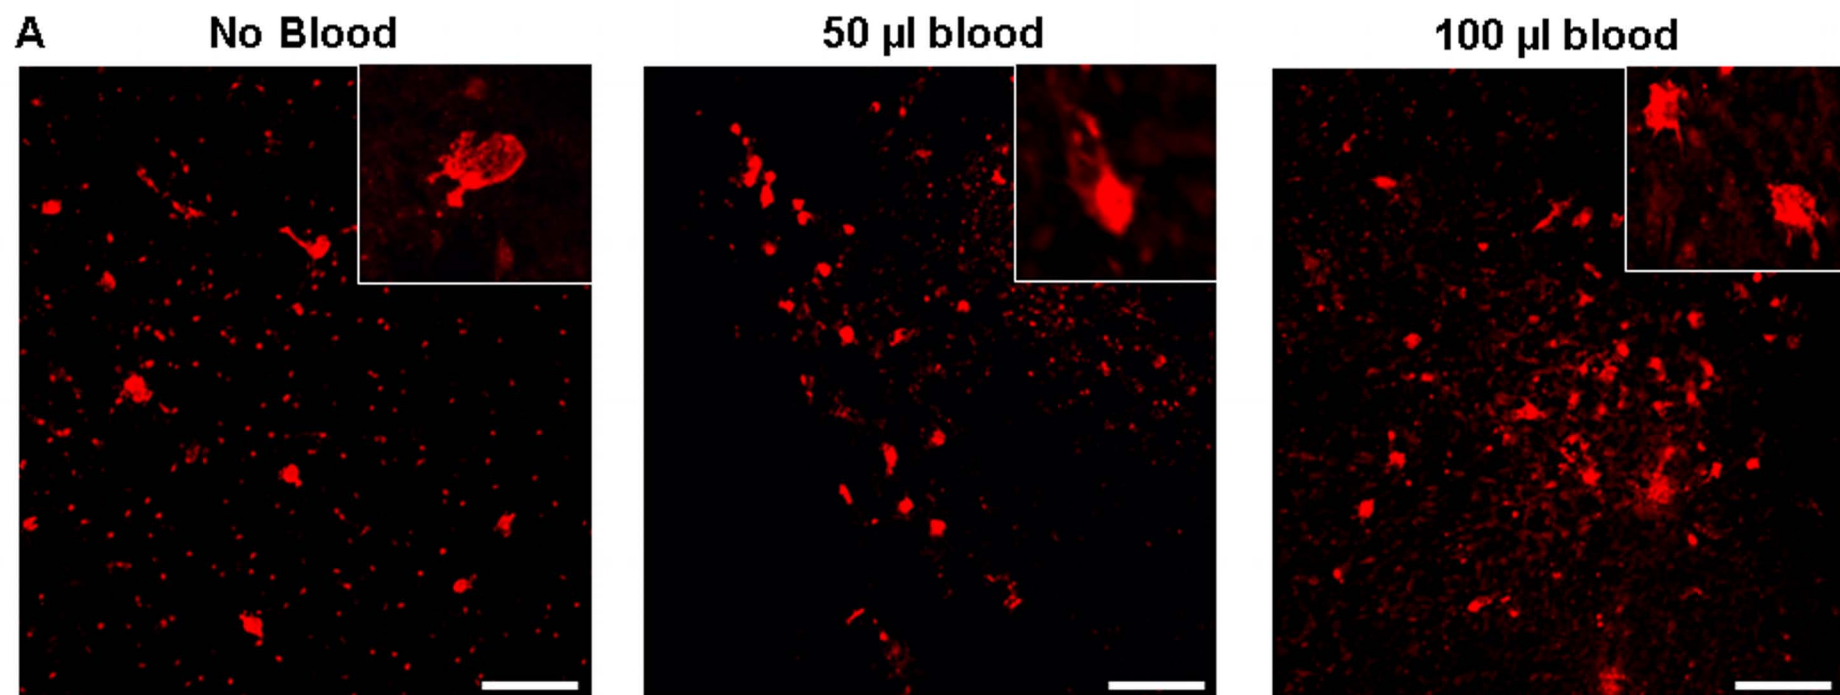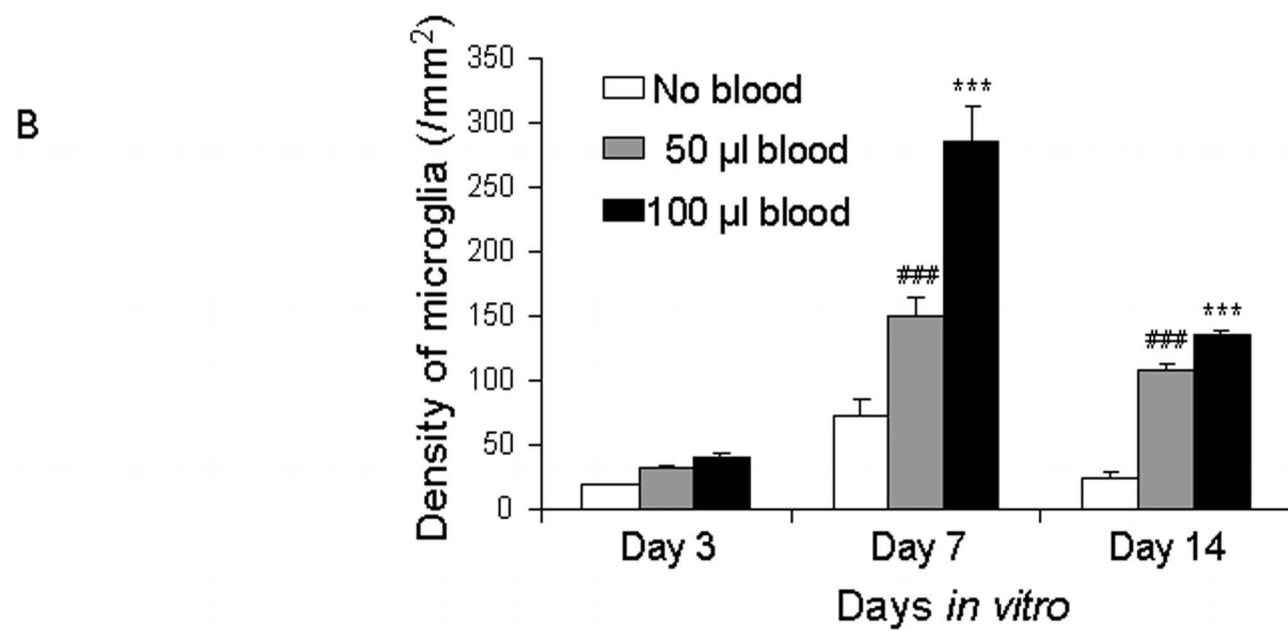

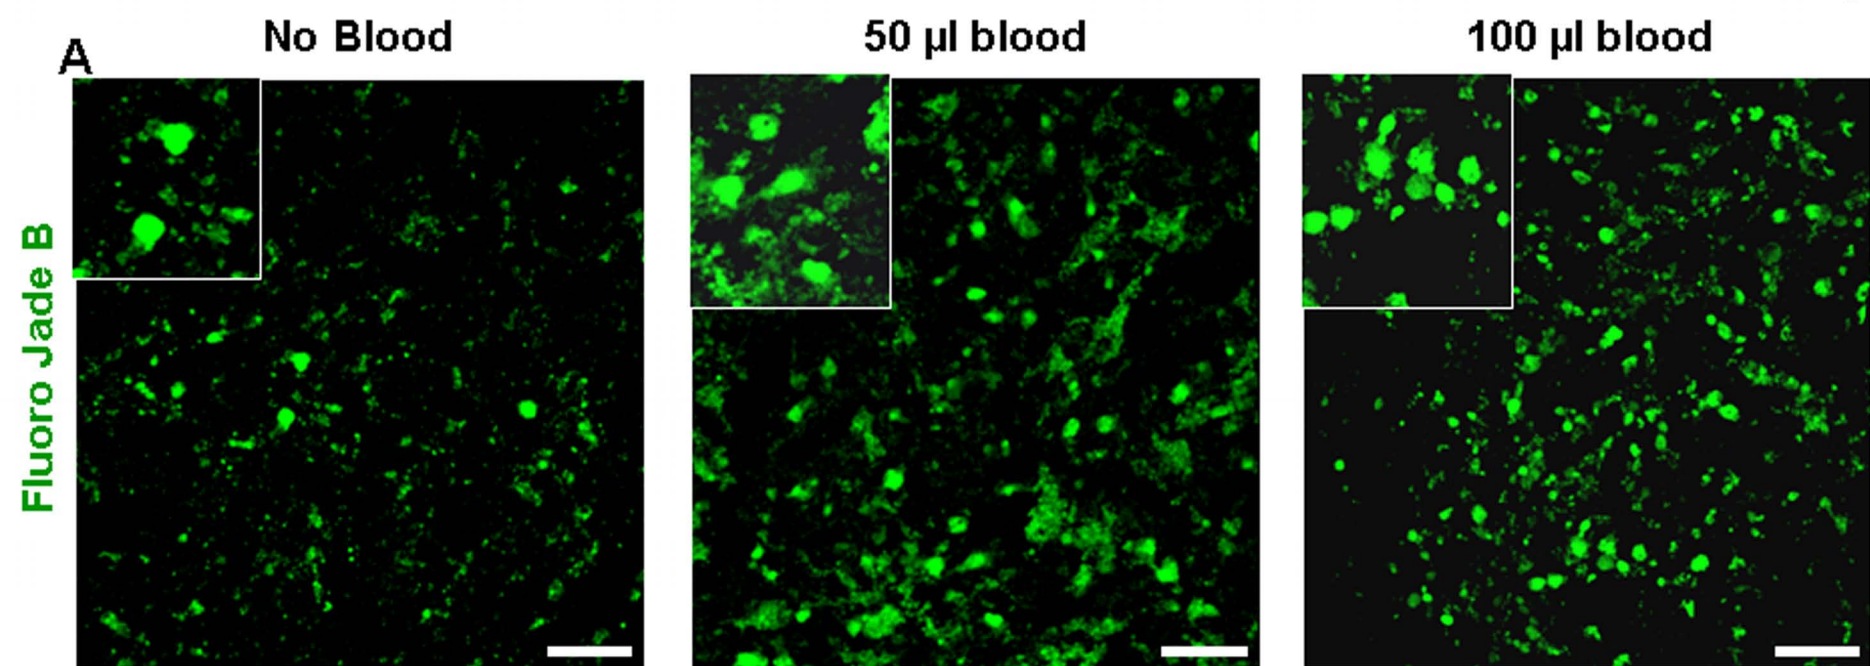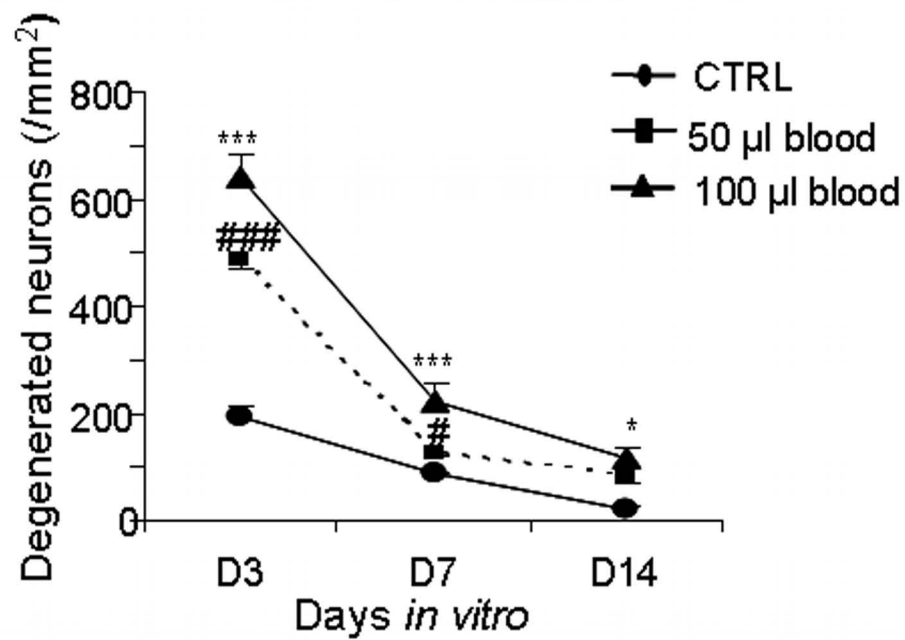



A

No Blood

50  $\mu$ l blood100  $\mu$ l blood

Myelin basic protein

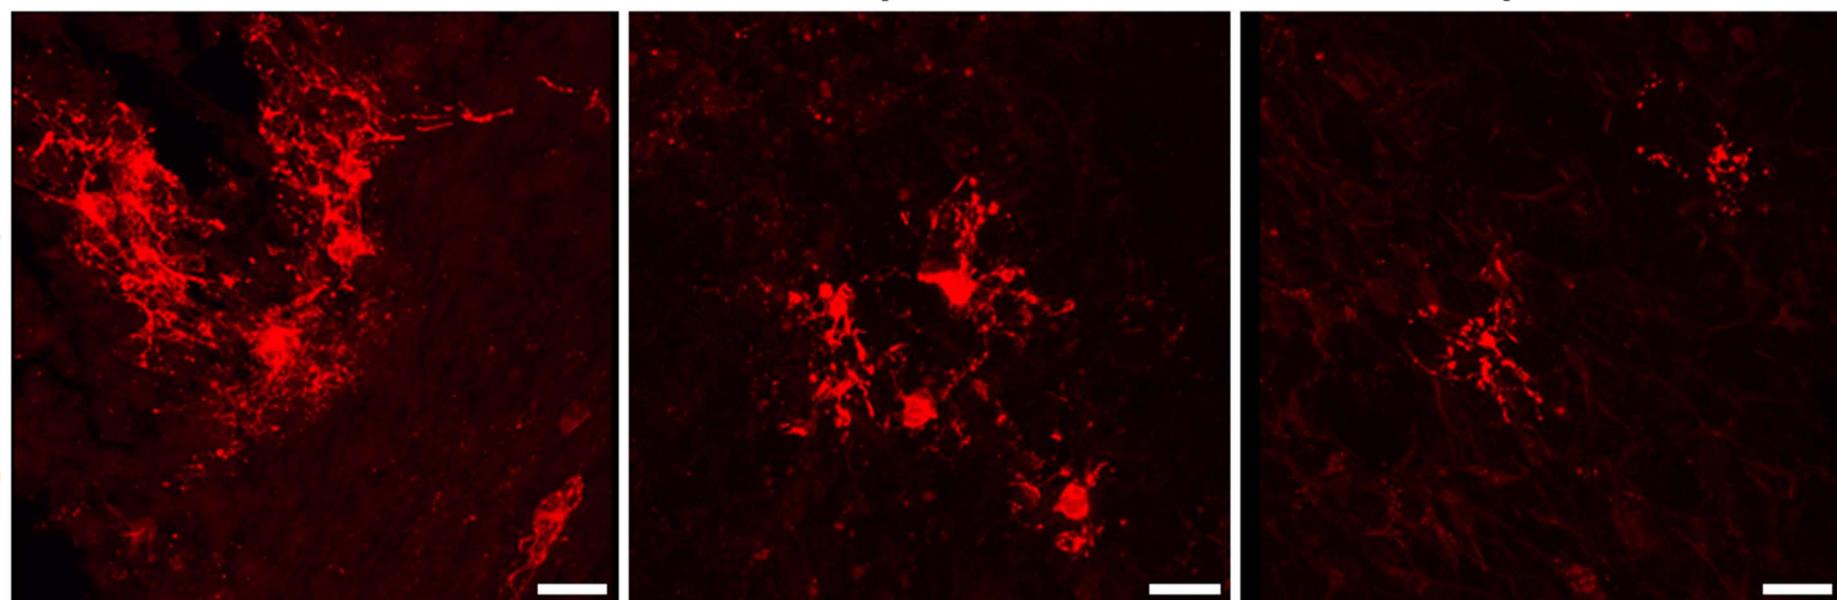

B

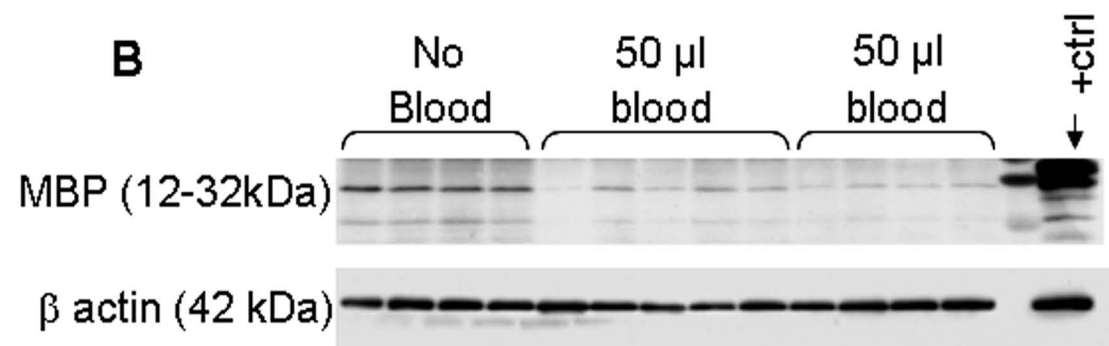

C

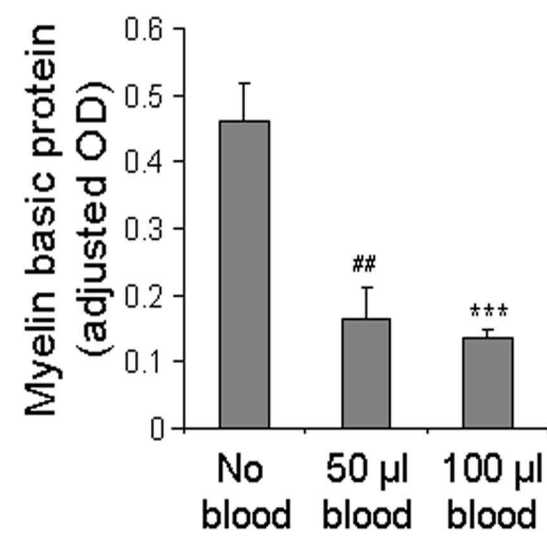

A

No blood

50  $\mu$ l blood100  $\mu$ l blood

GFAP

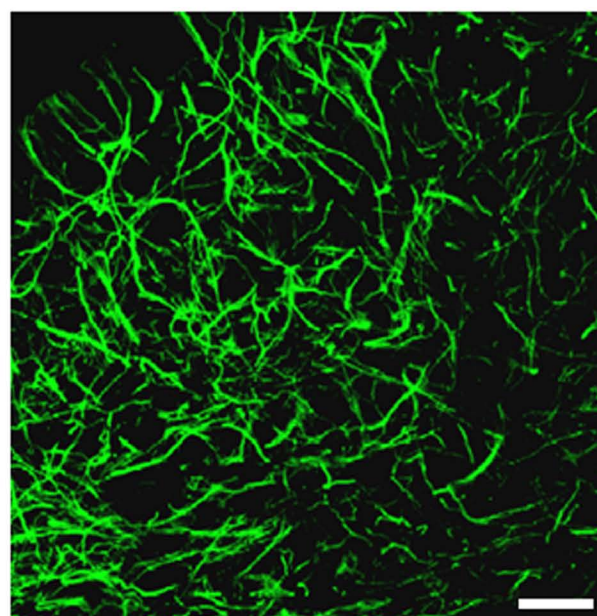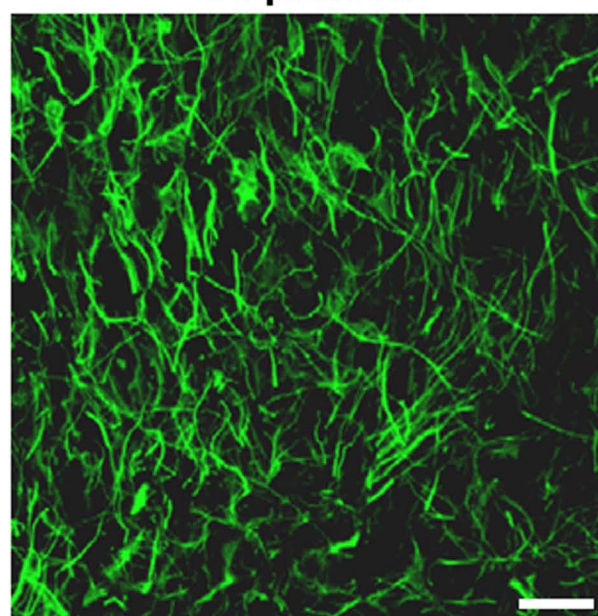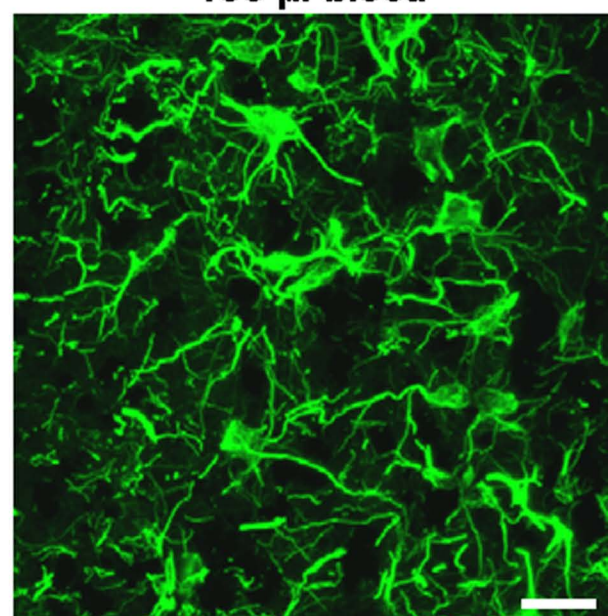

B

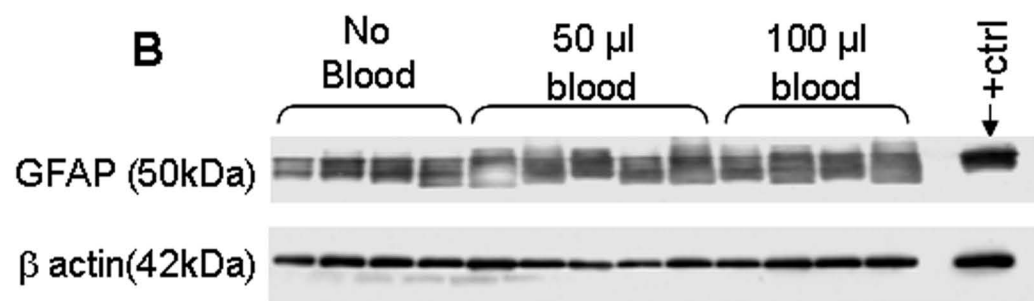

C

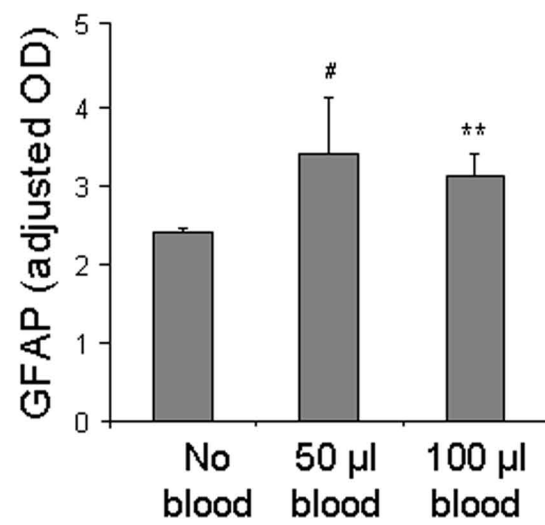



A

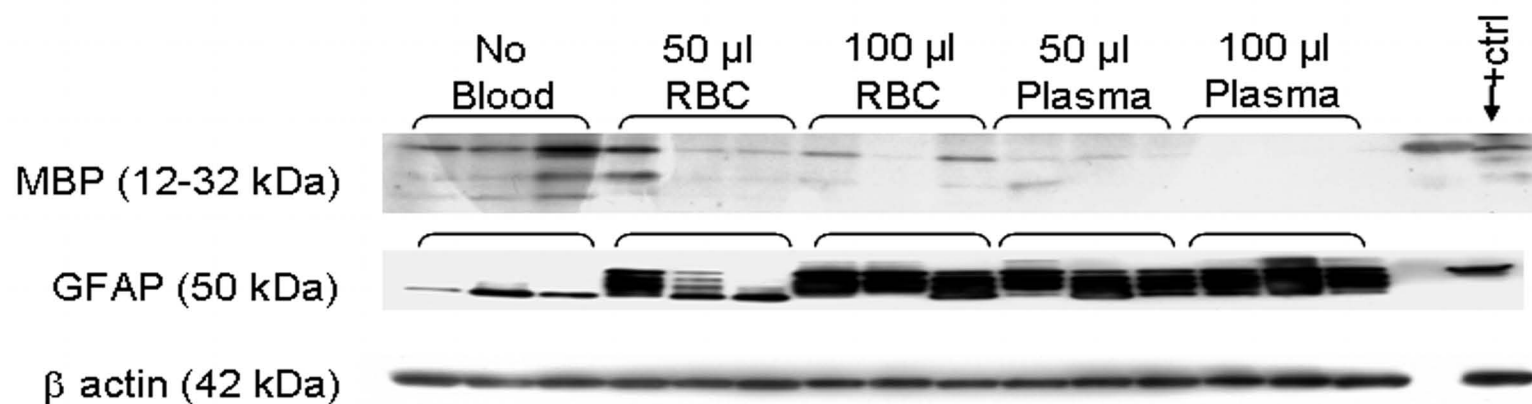

B

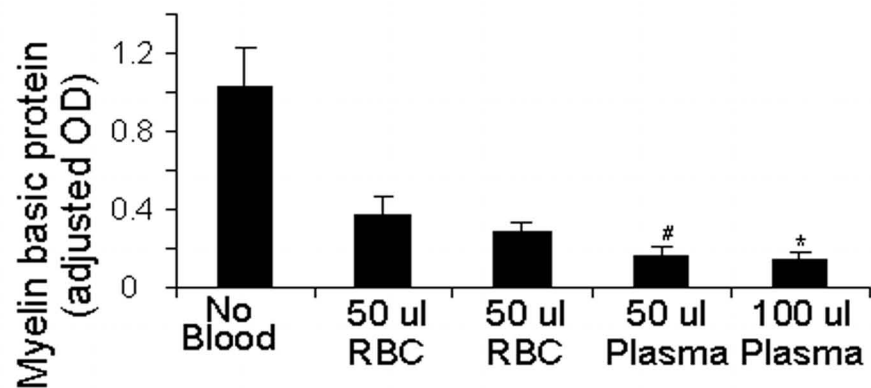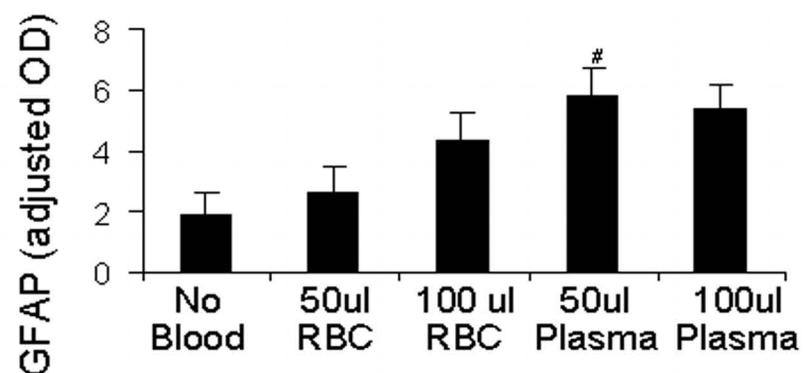

C

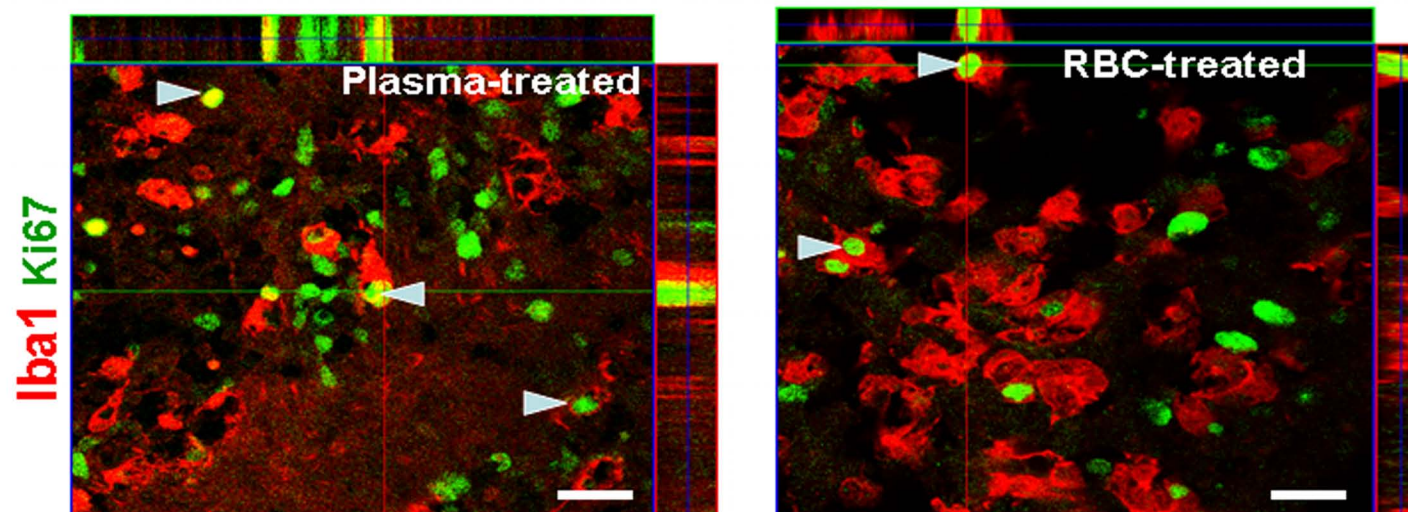

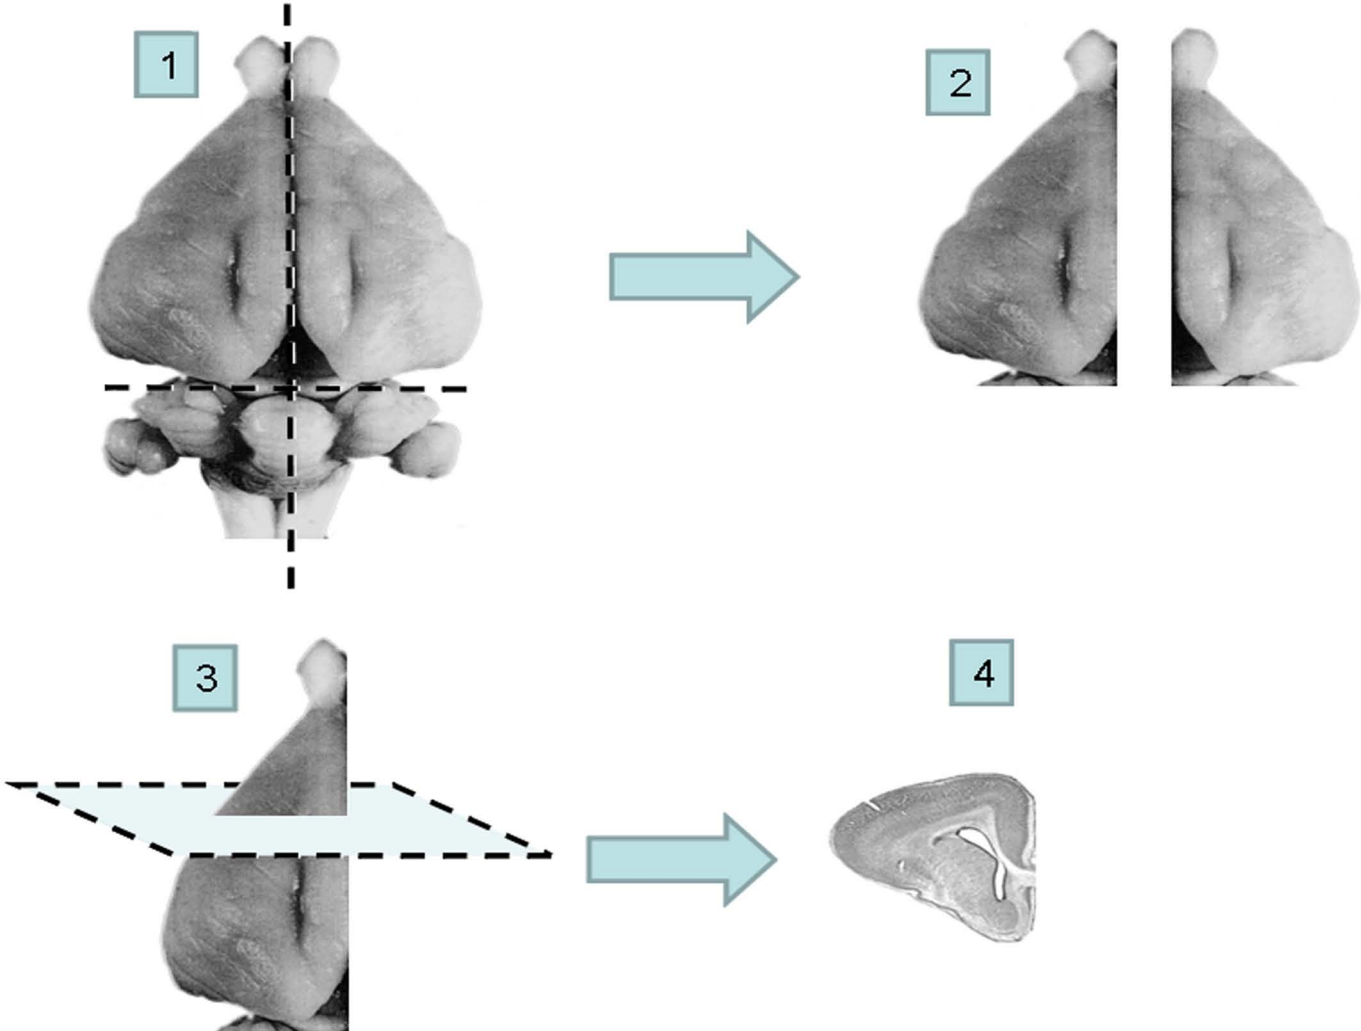

Supplementary Fig. 1
